# Supplementary material for: Synthesis and Spectroscopic Investigations of Schiff Base Ligand and Its Bimetallic Ag(I) Complex as DNA and BSA Binders
Source: MDPI journal article supplement (doi:10.3390/biom11101449), 2021-10-02
Supplement: s1 [file s1]

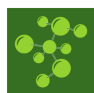

## Electronic Supplementary Information

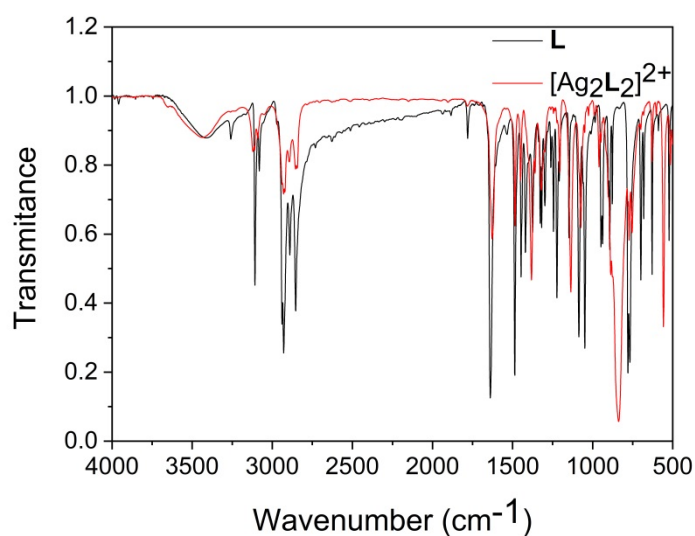

Figure S1. IR spectra of L and  $[Ag_2L_2]^{2+}$  in KBr.

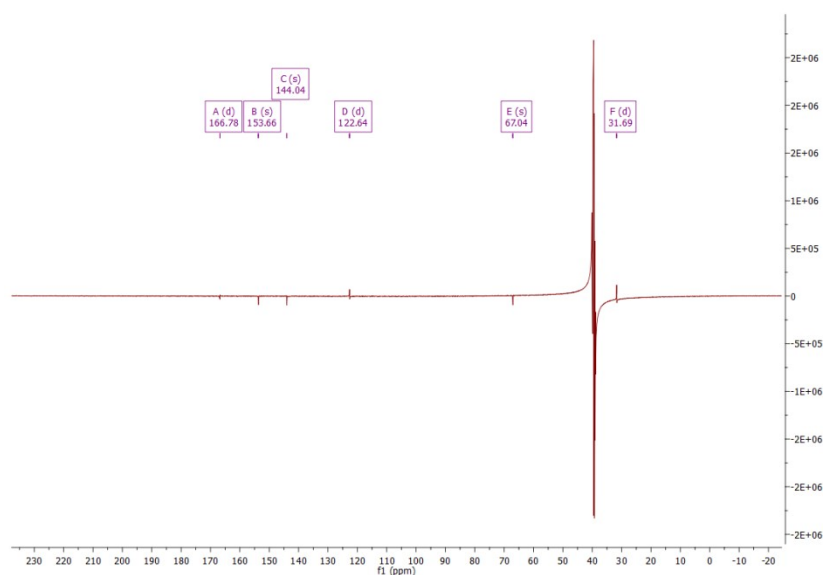

Figure S2.  $^{13}C$  NMR spectra for ligand L measured in  $(CD_3)_2SO$ .

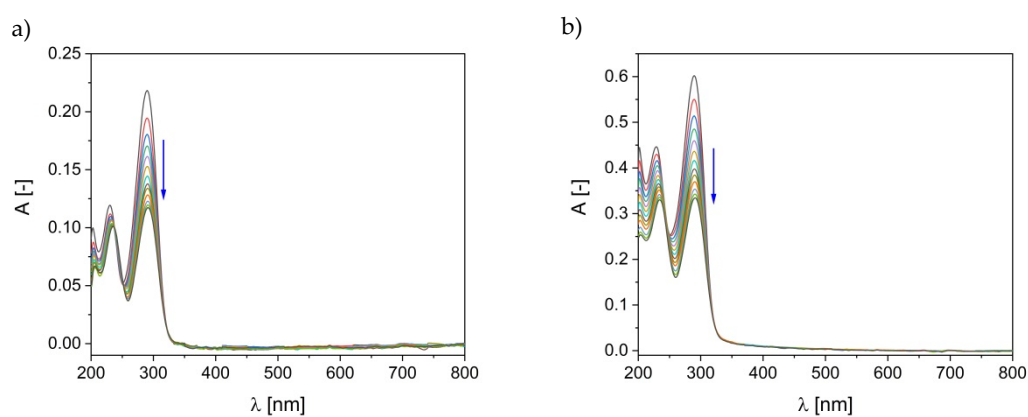

**Figure S3.** Stability tests of L (a) and  $[Ag_2L_2]^{2+}$  (b) (20  $\mu$ M) in PBS buffer (pH = 7.4) with 1% MeCN content. The tests were carried out from 0 to 120 minutes.

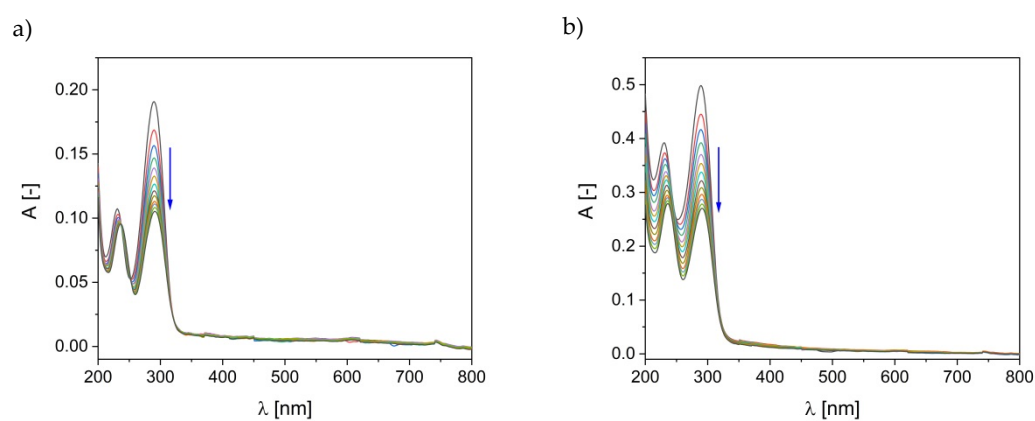

**Figure S4.** Stability tests of L (a) and  $[Ag_2L_2]^{2+}$  (b) (20  $\mu$ M) in Tris-HCl buffer (pH = 7.2) with 1% MeCN content. The tests were carried out from 0 to 120 minutes.

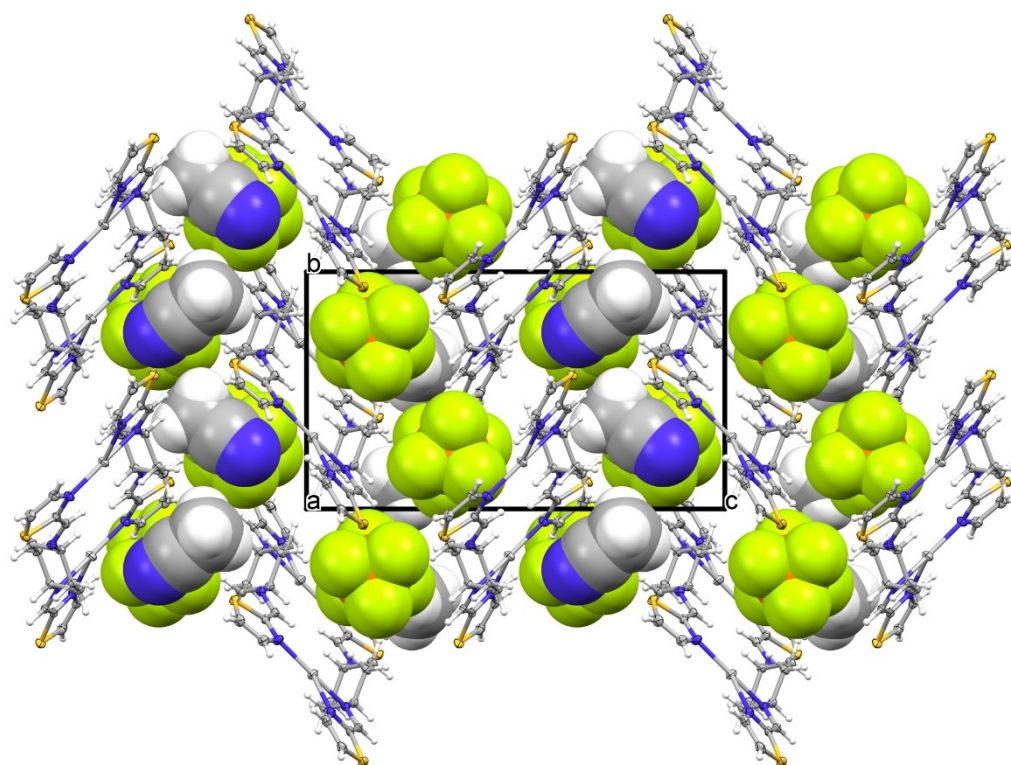

**Figure S5.** A crystal packing as seen along x-direction. The anions and solvent molecules are shown in the van der Waals radii representation.

a)

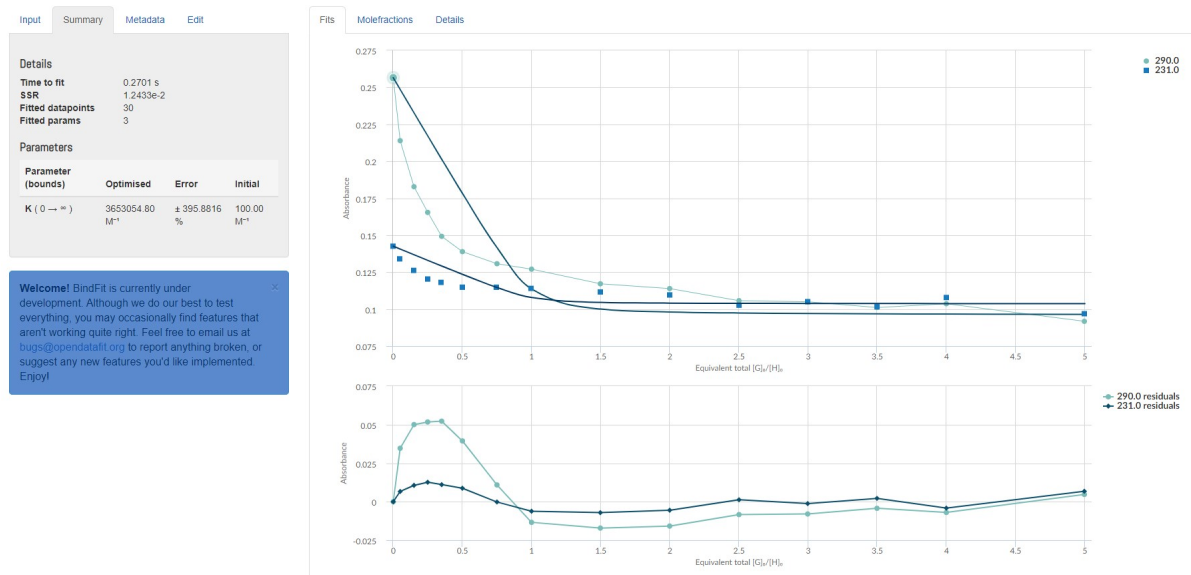

b)

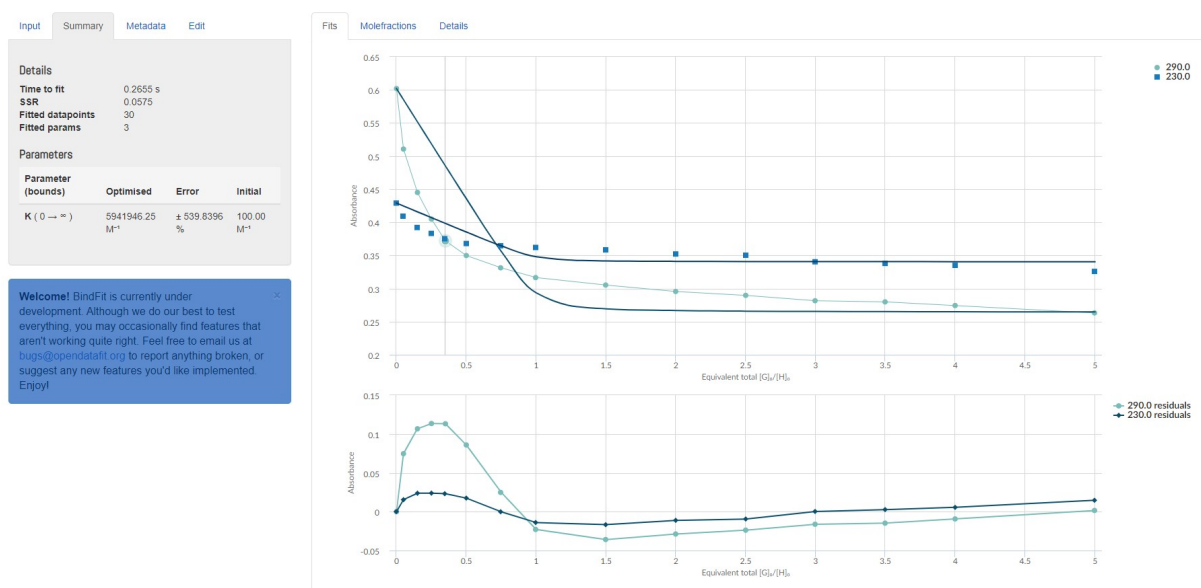

**Figure S6.** Bindfit fitting of UV-Vis titrations of **L** (a) and  $[Ag_2L_2]^{2+}$  (b) generated using website [supramolecular.org](http://supramolecular.org).
